# Supplementary material for: Regulation of Eco-Tropic Human Immunodeficiency Virus Type-1-infection by Sterile Alpha Motif and Histidine-Aspartic Domain Containing Protein-1 in a Microglial Cell Line: A novel in vitro model for studying HIV infection and latency in microglia
Source: Research Square preprint supplement (doi:10.21203/rs.3.rs-7075976/v1), 2025-07-15
Supplement: Supplementary file [file b3870ba41bc05e622b8cda6d.pdf]

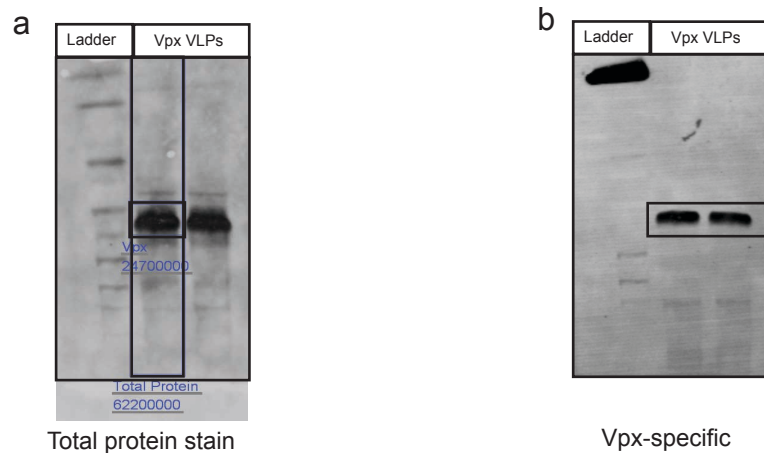

### Supplementary Figure 1

Vpx VLP Quantification. Lenti-XTM 293T cells were co-transfected with SIV Vpx and VSFG plasmids to generate Vpx virus-like particles (VLPs). Vpx VLP total protein was quantified by a BCA assay. Then, 20  $\mu$ g of sample was run on a western blot (WB). The Vpx-specific signal on the WB was divided by the total protein signal on the western blot to determine the %Vpx of total protein. This percentage was used to calculate the concentration of Vpx in the Vpx VLPs after conducting BCA assays. (a) Total protein western blot (b) Vpx-specific (1:1000) western blot

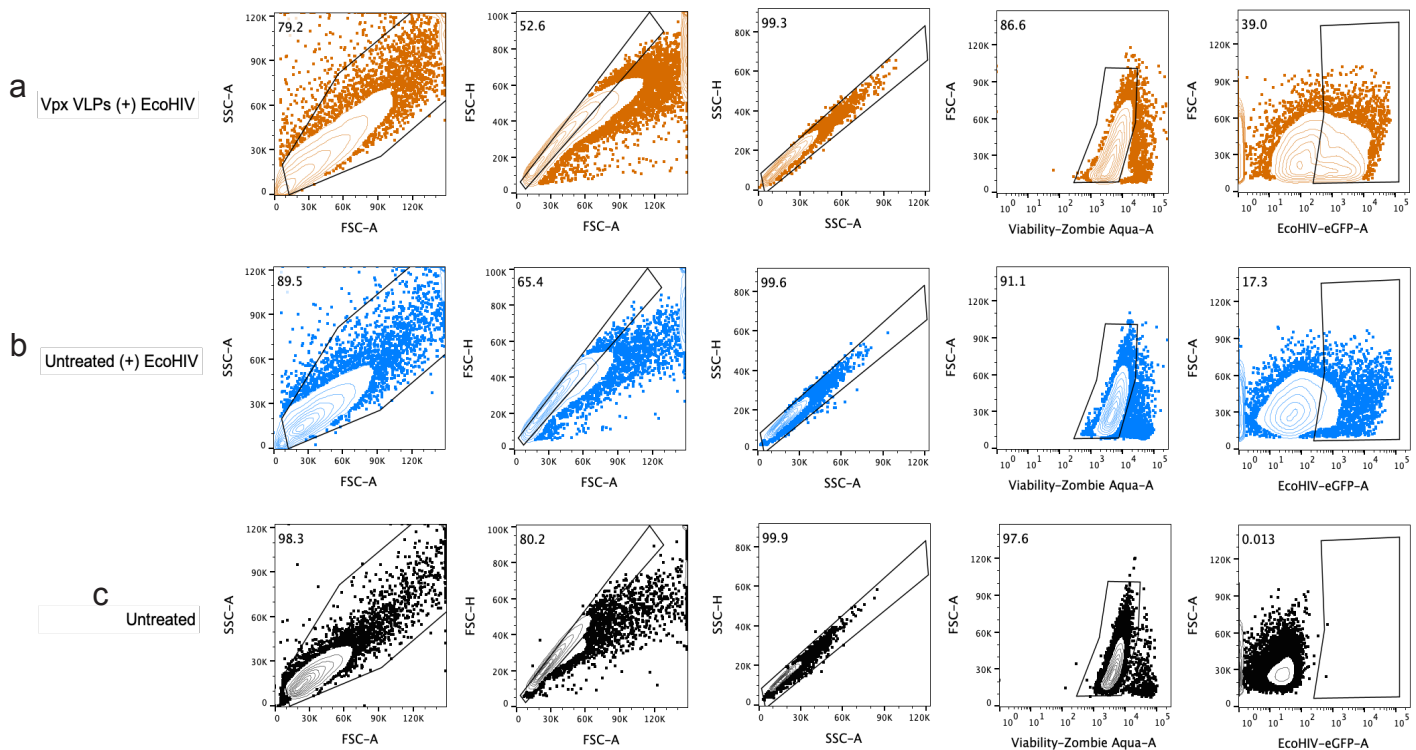

### Supplementary Figure 2

Flow Cytometry Gating Strategy for EcoHIV Infection Model In CHME5 Microglia. The CHME5 cell line was either pre-treated or not treated with SIV-derived Vpx virus-like particles (VLPs) for 4 hours prior to EcoHIV NL4.3-eGFP infection. EcoHIV infection of CHME5 was monitored via imaging and flow cytometry on day 2 post-infection (p.i.) and followed through day 10 p.i. Viability was also monitored via flow cytometry in these cells collected from days 2-10 p.i. (a, b, c) Vpx VLP (+) EcoHIV (orange), Untreated (+) EcoHIV (blue), and Untreated (black) example gating strategies.

|          | BCA Assay<br>Total<br>Protein | Total Protein<br>(mg/mL)/tube | Total Protein<br>Signal WB<br>(20 µg) | Vpx Signal<br>Total Protein<br>WB | %Vpx of<br>Total Protein |
|----------|-------------------------------|-------------------------------|---------------------------------------|-----------------------------------|--------------------------|
| Vpx VLPs | 1.55                          | 0.775                         | 62,193,984                            | 24,748,160                        | 39.79%                   |

#### **Supplementary Table 1**

Vpx VLP Quantification. Lenti-XTM 293T cells were co-transfected with SIV Vpx and VSVG plasmids to generate Vpx virus-like particles (VLPs). Vpx VLP total protein was quantified by a BCA assay. Then, 20 µg of sample was run on a western blot (WB). The Vpx-specific signal on the WB was divided by the total protein signal on the western blot to determine the %Vpx of total protein. This percentage was used to calculate the concentration of Vpx in the Vpx VLPs after conducting BCA assays.
